# Supplementary material for: Selection of genotypes harbouring mutations in the cytochrome b gene of Theileria annulata is associated with resistance to buparvaquone
Source: PubMed Central journal article supplement (PMC9812330; doi:10.1371/journal.pone.0279925), 2023-01-04
Supplement: pone.0279925.s003.pdf [file pone.0279925.s003.pdf]

**S1 Table. IC<sub>50</sub> values of different *T. annulata* isolates prepared before and after buparvaquone treatment.**

| Animal Code | Isolate Code | Treatment                       | IC <sub>50</sub> (ng/mL) | Animal Code | Isolate code | Treatment                       | IC <sub>50</sub> (ng/mL) | Animal Code | Isolate code | Treatment                       | IC <sub>50</sub> (ng/mL) |
|-------------|--------------|---------------------------------|--------------------------|-------------|--------------|---------------------------------|--------------------------|-------------|--------------|---------------------------------|--------------------------|
| 1           | A1/BT        | Before treatment                | 2.0                      | 43          | A115/AT1     | After 1 <sup>st</sup> treatment | 3.17                     | 85          | A162/BT      | Before treatment                | 1.34                     |
|             |              |                                 |                          |             | A115/AT2     | After 2 <sup>nd</sup> treatment | 6.36                     |             |              |                                 |                          |
| 2           | A2/BT        | Before treatment                | 3.20                     | 44          | A116/AT2     | After 2 <sup>nd</sup> treatment | 5.02                     | 86          | A163/BT      | Before treatment                | 1.96                     |
| 3           | A3/BT        | Before treatment                | 2.63                     | 45          | A117/AT1     | After 1 <sup>st</sup> treatment | 2.16                     | 87          | A164/BT      | Before treatment                | 0.88                     |
| 4           | A5/BT        | Before treatment                | 2.16                     | 46          | A118/BT      | Before treatment                | 5.02                     | 88          | A166/BT      | Before treatment                | 2.57                     |
| 5           | A6/BT        | Before treatment                | 3.52                     | 47          | A119/BT      | Before treatment                | 2.27                     | 89          | A167/BT      | Before treatment                | 2.09                     |
| 6           | A7/BT        | Before treatment                | 6.95                     | 48          | A120/AT1     | After 1 <sup>st</sup> treatment | 2.18                     | 90          | A168/AT1     | After 1 <sup>st</sup> treatment | 3.27                     |
|             |              |                                 |                          |             |              |                                 |                          |             | A168/AT3     | After 3 <sup>rd</sup> treatment | 4.59                     |
| 7           | A8/BT        | Before treatment                | 6.59                     | 49          | A121/AT1     | After 1 <sup>st</sup> treatment | 2.05                     | 91          | A169/BT      | Before treatment                | 0.68                     |
| 8           | A9/BT        | Before treatment                | 0.72                     | 50          | A122/AT1     | After 1 <sup>st</sup> treatment | 9.66                     | 92          | A170/AT1     | After 1 <sup>st</sup> treatment | 3.21                     |
|             |              |                                 |                          |             | A122/AT2     | After 2 <sup>nd</sup> treatment | 10.70                    |             |              |                                 |                          |
| 9           | A10/BT       | Before treatment                | 16.75                    | 51          | A123/BT      | Before treatment                | 3.87                     | 93          | A171/BT      | Before treatment                | 0.76                     |
|             | A10/AT3      | After 3 <sup>rd</sup> treatment | 135.0                    |             |              |                                 |                          |             |              |                                 |                          |
| 10          | A11/AT1      | After 1 <sup>st</sup> treatment | 1.83                     | 52          | A124/AT1     | After 1 <sup>st</sup> treatment | 1.34                     | 94          | A172/BT      | Before treatment                | 0.79                     |
| 11          | A12/AT1      | After 1 <sup>st</sup> treatment | 2.96                     | 53          | A125/BT      | Before treatment                | 2.91                     | 95          | A173/BT      | Before treatment                | 0.24                     |
| 12          | A13/AT1      | After 1 <sup>st</sup> treatment | 3.83                     | 54          | A126/BT      | Before treatment                | 1.34                     | 96          | A174/BT      | Before treatment                | 2.27                     |
| 13          | A14/AT2      | After 2 <sup>nd</sup> treatment | 2.62                     | 55          | A127/BT      | Before treatment                | 1.15                     | 97          | A175/BT      | Before treatment                | 2.0                      |
| 14          | A15/AT3      | After 3 <sup>rd</sup> treatment | 0.63                     | 56          | A128/BT      | Before treatment                | 0.69                     | 98          | A176/BT      | Before treatment                | 3.21                     |
| 15          | A16/AT1      | After 1 <sup>st</sup> treatment | 5.56                     | 57          | A129/BT      | Before treatment                | 1.67                     | 99          | A177/AT1     | After 1 <sup>st</sup> treatment | 2.97                     |
|             |              |                                 |                          |             |              |                                 |                          |             | A177/AT2     | After 2 <sup>nd</sup> treatment | 6.36                     |
| 16          | A17/AT1      | After 1 <sup>st</sup> treatment | 5.0                      | 58          | A130/BT      | Before treatment                | 1.54                     | 100         | A178/BT      | Before treatment                | 2.63                     |
| 17          | A18/AT1      | After 1 <sup>st</sup> treatment | 3.63                     | 59          | A131/BT      | Before treatment                | 0.34                     | 101         | A179/BT      | Before treatment                | 2.16                     |
|             |              |                                 |                          |             |              |                                 |                          |             | A179/AT1     | After 1 <sup>st</sup> treatment | 1.97                     |
| 18          | A21/AT1      | After 1 <sup>st</sup> treatment | 16.75                    | 60          | A132/AT2     | After 2 <sup>nd</sup> treatment | 3.21                     | 102         | A180/BT      | Before treatment                | 1.47                     |
|             | A21/AT3      | After 3 <sup>rd</sup> treatment | 25.53                    |             |              |                                 |                          |             | A180/AT2     | After 2 <sup>nd</sup> treatment | 7.48                     |
|             | A21/AT4      | After 4 <sup>th</sup> treatment | 73.79                    |             |              |                                 |                          |             |              |                                 |                          |
| 19          | A24/BT       | Before treatment                | 1.95                     | 61          | A133/BT      | Before treatment                | 1.86                     | 103         | A181/BT      | Before treatment                | 1.95                     |
| 20          | A25/AT1      | After 1 <sup>st</sup> treatment | 1.46                     | 62          | A134/AT1     | After 1 <sup>st</sup> treatment | 3.28                     | 104         | AC1/BT       | Before treatment                | 4.36                     |
| 21          | A26/BT       | Before treatment                | 3.27                     | 63          | A135/BT      | Before treatment                | 0.85                     | 105         | AC2/BT       | Before treatment                | 1.34                     |
| 22          | A27/BT       | Before treatment                | 1.40                     | 64          | A136/BT      | Before treatment                | 2.02                     | 106         | G1/BT        | Before treatment                | 1.46                     |
| 23          | A28/BT       | Before treatment                | 1.47                     | 65          | A137/BT      | Before treatment                | 0.52                     | 107         | G2/BT        | Before treatment                | 2.05                     |
| 24          | A29/BT       | Before treatment                | 1.39                     | 66          | A138/BT      | Before treatment                | 0.73                     | 108         | G3/BT        | Before treatment                | 4.73                     |
| 25          | A30/BT       | Before treatment                | 1.19                     | 67          | A139/BT      | Before treatment                | 1.02                     | 109         | G4/BT        | Before treatment                | 1.57                     |
| 26          | A31/BT       | Before treatment                | 2.58                     | 68          | A143/AT1     | After 1 <sup>st</sup> treatment | 2.31                     | 110         | N1/BT        | Before treatment                | 2.31                     |

|           |          |                                 |      |           |          |                                 |      |            |        |                                 |      |
|-----------|----------|---------------------------------|------|-----------|----------|---------------------------------|------|------------|--------|---------------------------------|------|
| <b>27</b> | A32/BT   | Before treatment                | 1.15 | <b>69</b> | A144/BT  | Before treatment                | 0.85 | <b>111</b> | N2/BT  | Before treatment                | 1.98 |
| <b>28</b> | A33/BT   | Before treatment                | 1.34 | <b>70</b> | A145/AT2 | After 2 <sup>nd</sup> treatment | 1.67 | <b>112</b> | N3/BT  | Before treatment                | 3.15 |
| <b>29</b> | A34/BT   | Before treatment                | 0.76 | <b>71</b> | A148/AT4 | After 4 <sup>th</sup> treatment | 6.20 | <b>113</b> | N4/BT  | Before treatment                | 2.31 |
| <b>30</b> | A100/BT  | Before treatment                | 2.16 | <b>72</b> | A149/BT  | Before treatment                | 1.50 | <b>114</b> | N5/BT  | Before treatment                | 2.04 |
|           | A100/AT1 | After 1 <sup>st</sup> treatment | 1.51 |           |          |                                 |      |            |        |                                 |      |
| <b>31</b> | A101/BT  | Before treatment                | 2.07 | <b>73</b> | A150/AT1 | After 1 <sup>st</sup> treatment | 2.97 | <b>115</b> | K1/BT  | Before treatment                | 4.69 |
|           | A101/AT2 | After 2 <sup>nd</sup> treatment | 1.50 |           |          |                                 |      |            |        |                                 |      |
| <b>32</b> | A102/BT  | Before treatment                | 3.52 | <b>74</b> | A151/AT1 | After 1 <sup>st</sup> treatment | 6.36 | <b>116</b> | K2/BT  | Before treatment                | 3.87 |
| <b>33</b> | A103/AT1 | After 1 <sup>st</sup> treatment | 1.57 | <b>75</b> | A152/BT  | Before treatment                | 1.69 | <b>117</b> | M1/BT  | Before treatment                | 3.19 |
| <b>34</b> | A106/BT  | Before treatment                | 2.58 | <b>76</b> | A153/BT  | Before treatment                | 0.92 | <b>118</b> | M2/AT1 | After 1 <sup>st</sup> treatment | 0.80 |
| <b>35</b> | A107/BT  | Before treatment                | 1.15 | <b>77</b> | A154/AT1 | After 1 <sup>st</sup> treatment | 1.15 | <b>119</b> | M3/BT  | Before treatment                | 2.91 |
| <b>36</b> | A108/BT  | Before treatment                | 1.34 | <b>78</b> | A155/AT1 | After 1 <sup>st</sup> treatment | 3.11 | <b>120</b> | M4/BT  | Before treatment                | 4.59 |
| <b>37</b> | A109/BT  | Before treatment                | 5.56 | <b>79</b> | A156/AT1 | After 1 <sup>st</sup> treatment | 2.16 | <b>121</b> | CN1/BT | Before treatment                | 0.78 |
|           | A109/AT2 | After 2 <sup>nd</sup> treatment | 1.55 |           | A156/AT2 | After 2 <sup>nd</sup> treatment | 3.52 |            |        |                                 |      |
|           |          |                                 |      |           | A156/AT3 | After 3 <sup>rd</sup> treatment | 4.73 |            |        |                                 |      |
| <b>38</b> | A110/AT3 | After 3 <sup>rd</sup> treatment | 5.56 |           | A157/BT  | Before treatment                | 1.55 | <b>122</b> | CN2/BT | Before treatment                | 1.39 |
| <b>39</b> | A111/BT  | Before treatment                | 1.83 | <b>81</b> | A158/BT  | Before treatment                | 0.89 | <b>123</b> | CN3/BT | Before treatment                | 3.56 |
| <b>40</b> | A112/BT  | Before treatment                | 1.28 | <b>82</b> | A159/BT  | Before treatment                | 0.69 | <b>124</b> | C1/BT  | Before treatment                | 1.37 |
| <b>41</b> | A113/BT  | Before treatment                | 3.19 | <b>83</b> | A160/BT  | Before treatment                | 1.67 | <b>125</b> | S1/AT1 | After 1 <sup>st</sup> treatment | 2.57 |
| <b>42</b> | A114/AT1 | After 1 <sup>st</sup> treatment | 1.34 | <b>84</b> | A161/BT  | Before treatment                | 1.57 | <b>126</b> | S2/AT1 | After 1 <sup>st</sup> treatment | 2.71 |

The letter at the beginning of the isolate code represents the provinces from which the isolate originated (A; Akcaova, AC; İncirliova, G; Germencik, N; Nazilli, K; Köşk, M; Center, CN; Koçarlı, C; Cine, S; Söke).

BT; indicates *T. annulata* isolates prepared before drug treatment

AT; indicates *T. annulata* isolates prepared after drug treatment. AT1-4 represents the number of drug treatments.
