# Supplementary material for: Selection of genotypes harbouring mutations in the cytochrome b gene of Theileria annulata is associated with resistance to buparvaquone
Source: PubMed Central journal article supplement (PMC9812330; doi:10.1371/journal.pone.0279925), 2023-01-04
Supplement: pone.0279925.s005.pdf [file pone.0279925.s005.pdf]

**S3 Table. AS-PCR results of clonal cell lines.**

| Isolate code   | Number of clonal cell lines (n) | Presence of Mutations |       |         |       |
|----------------|---------------------------------|-----------------------|-------|---------|-------|
|                |                                 | with                  |       | without |       |
|                |                                 | V135A                 | P253S | V135A   | P253S |
| <b>G3/BT</b>   | 39                              | -                     | -     | 39      | 39    |
| <b>N3/BT</b>   | 42                              | -                     | -     | 42      | 42    |
| <b>A9/BT</b>   | 45                              | -                     | -     | 45      | 45    |
| <b>A10/BT</b>  | 41                              | 38                    | -     | 3       | 41    |
| <b>A10/AT3</b> | 45                              | 45                    | -     | -       | 45    |
| <b>A16/AT1</b> | 40                              | -                     | -     | 40      | 40    |
| <b>A21/BT</b>  | 48                              | -                     | 48    | 48      | -     |
| <b>A21/AT4</b> | 49                              | -                     | 8     | 49      | 41    |
