# Supplementary material for: Selection of genotypes harbouring mutations in the cytochrome b gene of Theileria annulata is associated with resistance to buparvaquone
Source: PubMed Central journal article supplement (PMC9812330; doi:10.1371/journal.pone.0279925), 2023-01-04
Supplement: pone.0279925.s006.pdf [file pone.0279925.s006.pdf]

**S4 Table.** Summary of mutations detected in *Cyto b* sequences of *T. annulata* isolates from Tunisia, Sudan, Iran and Turkey.

| <b>Nucleotide</b>            | <b>234</b> | <b>385</b> | <b>404</b>   | <b>417</b> | <b>429</b> | <b>436</b>   | <b>679</b>   | <b>757</b>   | <b>870</b> |
|------------------------------|------------|------------|--------------|------------|------------|--------------|--------------|--------------|------------|
| <b>Codon</b>                 | <b>78</b>  | <b>129</b> | <b>135*</b>  | <b>139</b> | <b>143</b> | <b>146*</b>  | <b>227*</b>  | <b>253*</b>  | <b>290</b> |
| Tancytb (XM949625)           | TCG        | AGC        | GTC<br>(Val) | TTA        | TTC        | GCT<br>(Ala) | GTG<br>(Val) | CCT<br>(Pro) | GTA        |
| Position of common mutations | ..A        | G..        | .C.<br>(Ala) | ..G        | ..T        | A..<br>(Thr) | A..<br>(Met) | T..<br>(Ser) | ..G        |
| Tunisian samples             |            | +          |              | +          | +          | +            |              | +            | +          |
| Sudanese samples             | +          | +          |              | +          | +          | +            | +            |              | +          |
| Iranian samples              |            | +          |              |            |            |              |              | +            |            |
| Egyptian samples             |            |            |              |            |            |              |              | +            |            |
| Turkish samples              | +          |            | +            | +          |            | +            | +            | +            | +          |

(\*) indicates the non-synonymous mutations sites
